# Supplementary material for: S-functionalized 2D V2B as a promising anode material for rechargeable lithium ion batteries
Source: Royal Society of Chemistry journal article supplement (doi:10.1039/d2cp05477a), 2022-12-27
Supplement: d2cp05477a1.pdf [file d2cp05477a1.pdf]

# **S-functionalized 2D V<sub>2</sub>B as promising anode materials for rechargeable lithium ion batteries**

Yuhang Wang,<sup>a</sup> Ninggui Ma,<sup>a</sup> Yaqin Zhang,<sup>a</sup> Bochun Liang,<sup>a</sup> Jun Zhao,<sup>a</sup> and Jun Fan<sup>a, b, \*</sup>

<sup>a</sup> *Department of Materials Science and Engineering, City University of Hong Kong, Hong Kong, China.*

<sup>b</sup> *Center for Advance Nuclear Safety and Sustainable Department, City University of Hong Kong, Hong Kong, China*

\*Corresponding author

*Email address:* junfan@cityu.edu.hk (Jun Fan)

**Fig. S1**

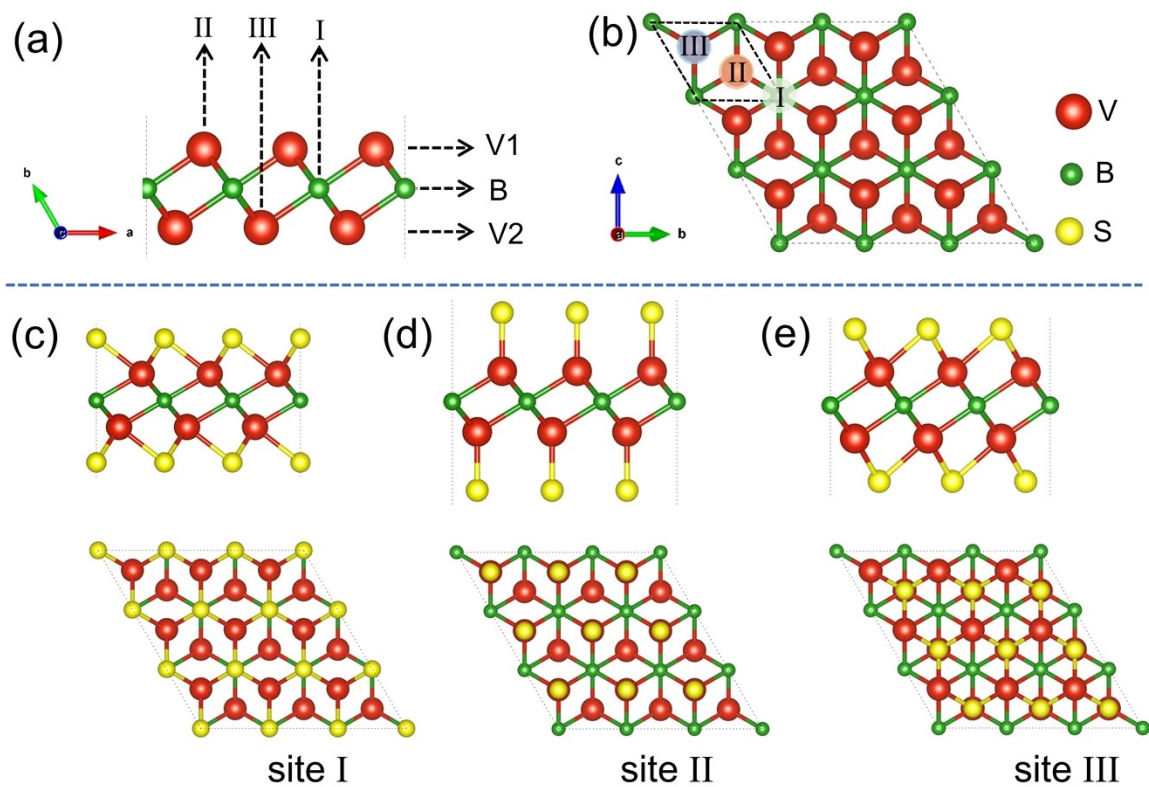

**Fig. S1** Top (a) and side (b) view of pristine  $V_2B$ . Possible sites for functional atoms are labelled as I (c), II (d), and III (e).

**Fig. S2**

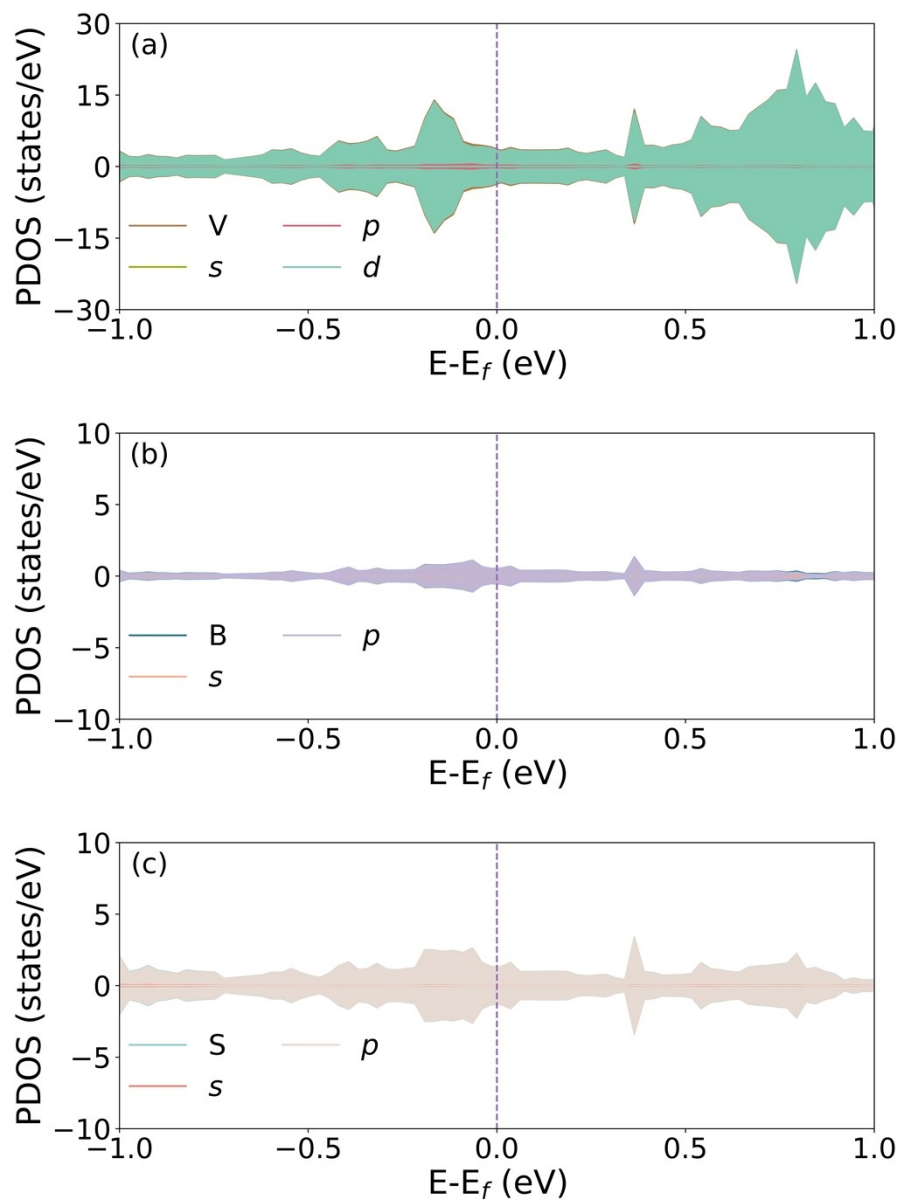

Fig. S2 The partial density of states (PDOS) for V (a), B (b), and S (c) in  $V_2BS_2$ .

**Fig. S3**

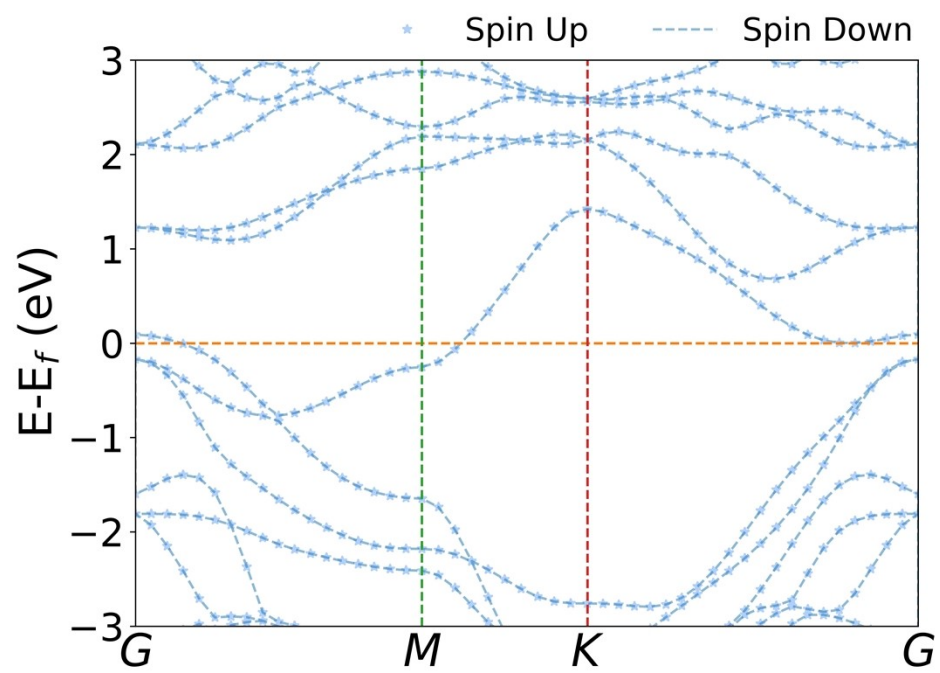

Fig. S3 Band structure of  $V_2BS_2$  using HSE06 functional.

**Fig. S4**

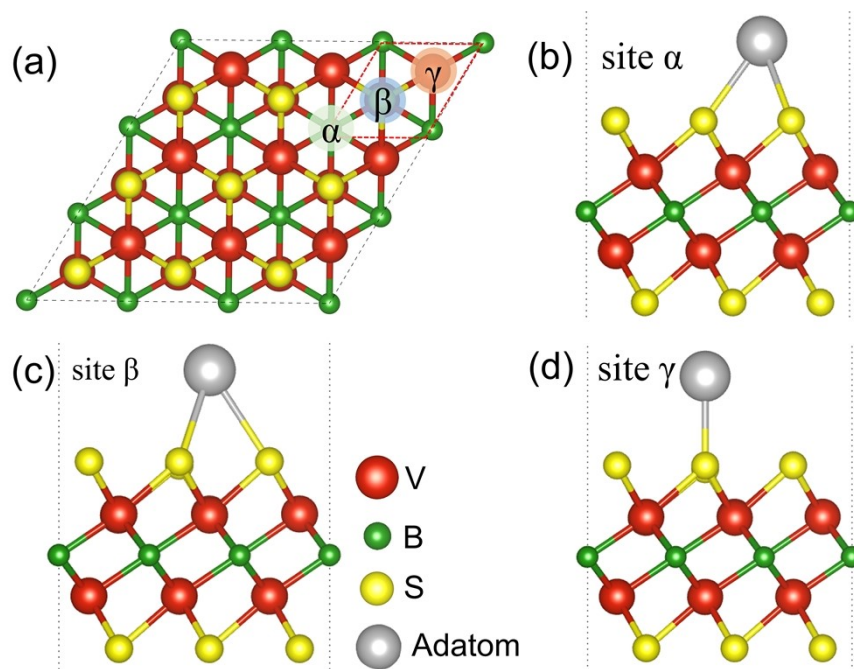

Fig. S4 Top view of possible adsorption sites for metal ions (a), side view for adatom at different sites: (b) on the top of B atom, (c) on the top of V1 atom, (c) on the top of V2 atom.

**Fig. S5**

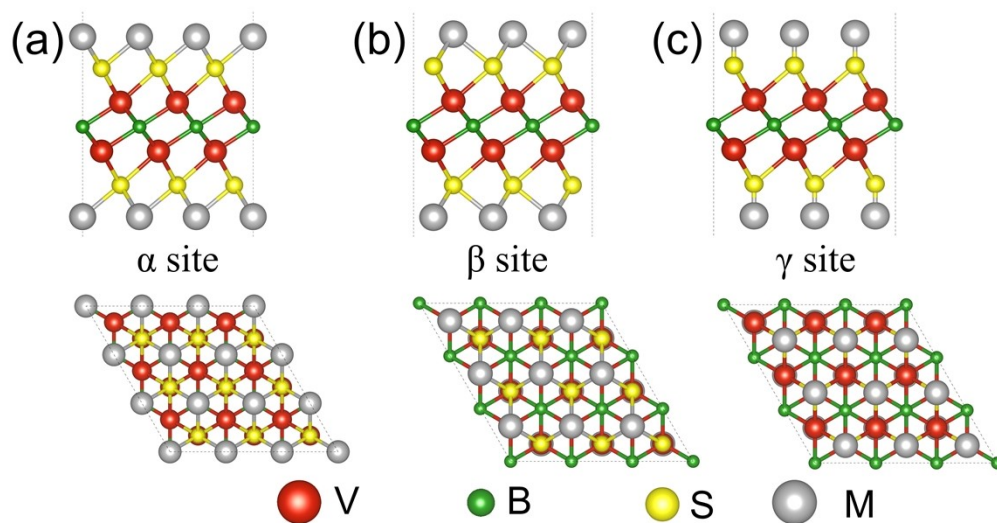

Fig. S5 Adsorption configurations side view and top view for one M layer on  $V_2BS_2$  monolayer:

(a)  $\alpha$  site, (b)  $\beta$  site, and (c)  $\gamma$  site.

**Fig. S6**

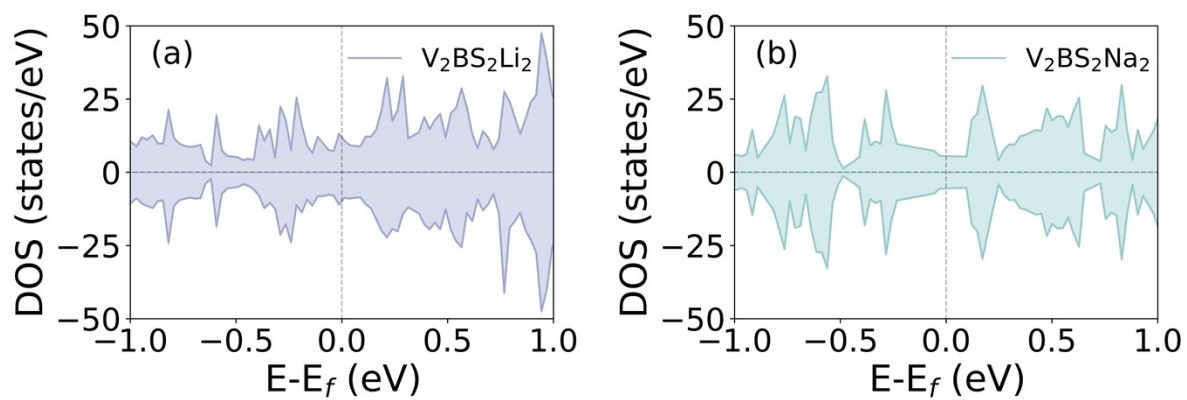

Fig. S6 Density of states (DOS) of stoichiometry of (a)  $V_2BS_2Li_2$  and (b)  $V_2BS_2Na_2$ .

**Fig. S7**

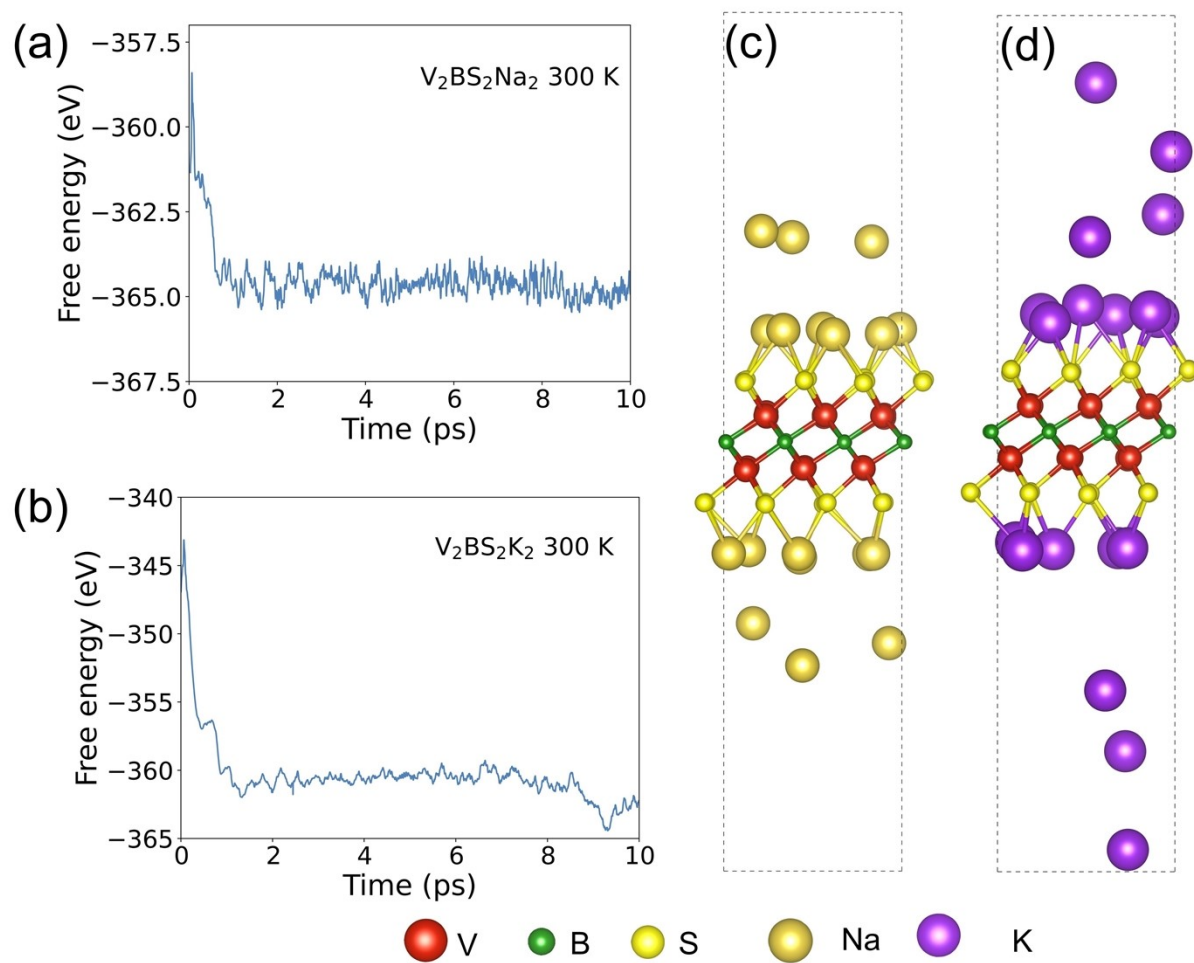

Fig. S7 The variation of the free energy during AIMD simulation at 300 K for stoichiometry of (a)  $V_2BS_2Na_2$  and (b)  $V_2BS_2K_2$ . Side views of (c)  $V_2BS_2Na_2$  and (d)  $V_2BS_2K_2$  after simulation.



## Table S1

Table S1 Comparison of the lattice constant, bond length, layer thickness of V<sub>2</sub>BS<sub>2</sub> with other related materials.

|                                 | <b>Lattice constant (Å)</b> | <b>Bond length (V-C/N/B) (Å)</b> | <b>Bond length (V-S) (Å)</b> | <b>Thickness</b> | <b>Ref.</b>      |
|---------------------------------|-----------------------------|----------------------------------|------------------------------|------------------|------------------|
| V <sub>2</sub> BS <sub>2</sub>  | 3.05                        | 2.13                             | 2.34                         | 5.47             | <b>This work</b> |
| V <sub>2</sub> CS <sub>2</sub>  | 3.06                        | 2.08                             | 2.37                         | 5.34             | [1]              |
| V <sub>2</sub> NS <sub>2</sub>  | 3.09                        | 2.06                             | 2.35                         | /                | [2]              |
| Ti <sub>2</sub> NS <sub>2</sub> | 3.17                        | 2.07                             | 2.39                         | /                | [3]              |
| Ti <sub>2</sub> CS <sub>2</sub> | 3.197                       | 2.211                            | 2.406                        | /                | [4]              |
| Ti <sub>2</sub> BS <sub>2</sub> | 3.50                        | 2.306                            | 2.392                        | 4.78             | [5]              |

**Table S2**Table S2 Summary of adsorption energy (unit: eV) for Li, Na, and K at different sites on V<sub>2</sub>BS<sub>2</sub>.

| <b>Adatoms</b> | <b>Adsorption sites</b> | $E_{ad}^{1st}$ | $E_{ad}^{2nd}$ | $E_{ad}^{3rd}$ |
|----------------|-------------------------|----------------|----------------|----------------|
| Li             | $\alpha$                | -0.530         | -0.023         | 0.030          |
|                | $\beta$                 | -0.702         | 0.058          | 0.035          |
|                | $\gamma$                | -0.166         | -0.044         | 0.132          |
| Na             | $\alpha$                | -0.306         | 0.113          | \              |
|                | $\beta$                 | -0.327         | 0.122          | \              |
|                | $\gamma$                | -0.099         | 0.112          | \              |
| K              | $\alpha$                | 0.469          | \              | \              |
|                | $\beta$                 | 0.426          | \              | \              |
|                | $\gamma$                | 0.889          | \              | \              |

<sup>a</sup> “\” means the corresponding V<sub>2</sub>BS<sub>2</sub> can’t adsorb full layer of Li/Na/K.

## References

1. Yan, B., et al., *Oxygen/sulfur decorated 2D MXene  $V_2C$  for promising lithium ion battery anodes*. *Materials Today Communications*, 2020. **22**: p. 100713.
2. Shukla, V., et al., *Modelling high-performing batteries with Mxenes: The case of S-functionalized two-dimensional nitride Mxene electrode*. *Nano Energy*, 2019. **58**: p. 877-885.
3. Yao, C., et al., *Properties of S-Functionalized Nitrogen-Based MXene ( $Ti_2NS_2$ ) as a Hosting Material for Lithium-Sulfur Batteries*. *Nanomaterials*, 2021. **11**(10): p. 2478.
4. Siriwardane, E.M., et al., *Assessment of Sulfur-functionalized MXenes for Li-ion Battery applications*. *The Journal of Physical Chemistry C*, 2020. **124**(39): p. 21293-21304.
5. Wang, Y., et al., *Exploring the potential of  $Ti_2BT_2$  ( $T = F, Cl, Br, I, O, S, Se$  and  $Te$ ) monolayers as anode materials for lithium and sodium ion batteries*. *Applied Surface Science*, 2022. **596**: p. 153619.
